# Supplementary material
Source: PubMed Central journal article supplement (PMC4734554)
Supplement: supp_pp.15.01163_01163suppdatafinal.pdf [file supp_pp.15.01163_01163suppdatafinal.pdf]

```

*          20          *          40          *          60          *          80          *          100         *          120
NPF2.4 : MANSIDGDKREPHRS---SRH--GGWITIPFMLEVTLGMSITYEGWVMNLIVFLIEEFNFKSIAAVQISNVNGVVMNLPVVAAILADSFPGNIPVICASAFISITGHSLLTLTASLDYLR : 115
NPF2.3 : MASSIVSGDKREPHRS---SGTPGSKR--GGWITIPFMLEVTLGGLSVTSEGWVMNLIVFLIEEFNFKSIAAAQISNVANGCLSMLEPVVAAILADSFPGNIPVICASAFISITGHSLLTLTASLDYLR : 119
NPF2.7 : MASSVIGDREPHRS---SSTRKRRGGWITIPFMLEVTLGLTAAAGWLLNLIVFLIEEFNFKSIAAAQIANVSGCICQVVEVAAILADSFPGTIPVICASAFISIMGVALLTLTASLDYLR : 121

*          140         *          160         *          180         *          200         *          220         *          240
NPF2.4 : PRPCEIAGSLCQSPSKLCLGLLYAALALVITGAGTRFILLASAGANQYKKEKQGRFFNWFFFTLYCGAITGTTAIVYAQDNASWKLGFGLCAANLISFIIFVAGKRILYEHDCPLGSHYT : 236
NPF2.3 : PRPCEIAGSLCQSPSKLCLGLLYAALALVITGAGTRFILLASAGANQYKKEKQGRFFNWFFFTLYCGAITGTTAIVYIQDNASWKLGFGLCAANLISFIIFVAGKRILYEHDCPLGSHYT : 240
NPF2.7 : PRPCEIAGSLCQSPSKLCLGLVLYAATLASIGTGGTRFTIATAGANQYKKEKQGRFFNWFFFTLYLAGAITSATAIVYTDNISWTLGFGLSAANFFSFIIFVAGKRILYEHDCPLGSHYT : 242

*          260         *          280         *          300         *          320         *          340         *          360
NPF2.4 : SILRVLVVAAMKRRKAVLSYKDEYHRELEKETRTYVAMPKSFRLNRAALKTEGTSN-----NNMWRLCSVQEVDFKAVIRLVEPLWLSIIFVSTPMVMCTSLIIVLQALVDRGLGEN : 351
NPF2.3 : SILRVLVVAAMKRRKAVLSYKDEYHRELEKETRTYVAMPKSFRLNRAALMKDELINQKEGTVNNIWRRLCSVQEVDFKAVIRLVEPLWLSIIFVSTPMVMCTSLIIVLQALVDRGLGEN : 361
NPF2.7 : SILRVLVVAAMKRRKAVLSYKDEYHRELEKETRTYVAMPKSFRLNRAALKTEGTSN-----ESITMTEKSFRELNRAALKTEGTSN-----NNMWRLCSVQEVDFKAVIRLVEPLWLSIIFVSTPMVMCTSLIIVLQALVDRGLGEN : 354

*          380         *          400         *          420         *          440         *          460         *          480
NPF2.4 : FKVVSAGSMQVIAIVSGCYEIIILNNWTTIPMYCKTIRRELTPLQVVGIGHVLITLSMAISAVVEAKRLKTVENSEL-----MSVLWLVFALVINGIGEAFFPANTAIYGEFPPESIRN : 464
NPF2.3 : FKVVSAGSLQVITIIITACIVIIIMNNWVFPYKKLIRRELTPLQVVGIGHVLITLSMAISAVVEAKRLKTVENGEP-----MSVLWLVFALVINGIGEAFFPANTAIYGEFPPESIRN : 474
NPF2.7 : FKVVSAGSLQVITIIITACIVIIIMNNWVFPYKKLIRRELTPLQVVGIGHVLITLSMAVTAIVVEAKRLKTVENGEP-----MSVLWLVFALVINGIGEAFFPANTAIYGEFPPESMRS : 475

*          500         *          520         *          540         *          560
NPF2.4 : TATSITSVVVGISFYLSSTALIDLIQRTTAWLPNDINHGVRVDNVYVILVIGGIVNFGYFLVCSWYKYRNLKDDHEQILKDVIN* : 548
NPF2.3 : TATSITSVVVGISFYLSSTALIDLIQRTTAWLPNDINHGVRVDNVYVILVIGGIVNFGYFLVCSWYKYRNLKDDHEQILKDVIN* : 558
NPF2.7 : TATSITSVVVGISFYLSSTALIDLIQRTTAWLPNDINHGVRVDNVYVILVIGGIVNFGYFLVCSWYKYRNLKDDHEQILKDVIN* : 558

```

Supplemental Figure 1 Multiple sequence alignment of NPF2.4, NPF2.3 and NPF2.1/ NAXT1.

Protein sequence alignment was performed using ClustalW2 program with a gap open of 10 and a gap extension of 0.1. The black and shaded regions represent identical residues and conservative substitutions, respectively.

**A**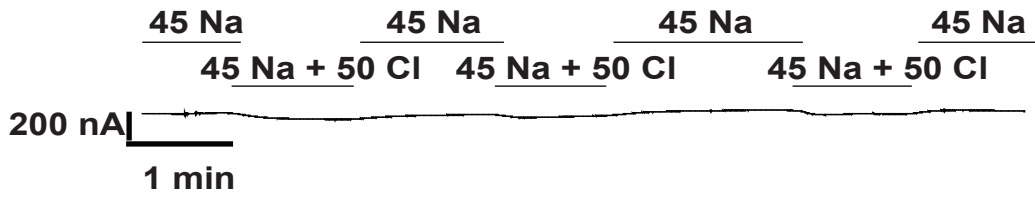**B**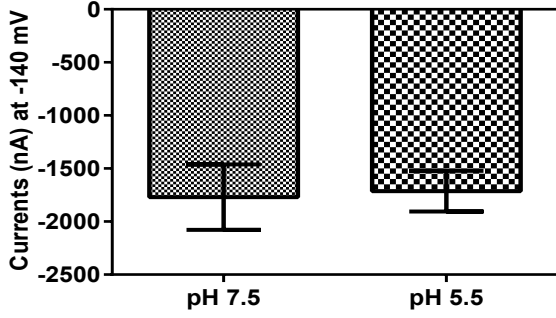**C**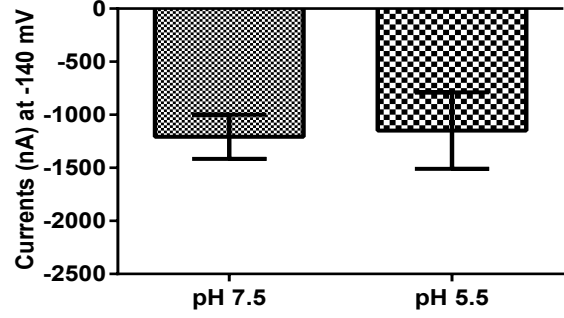**D**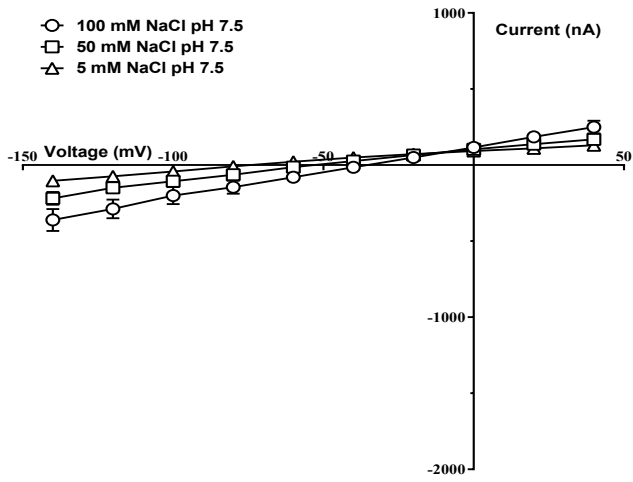**E**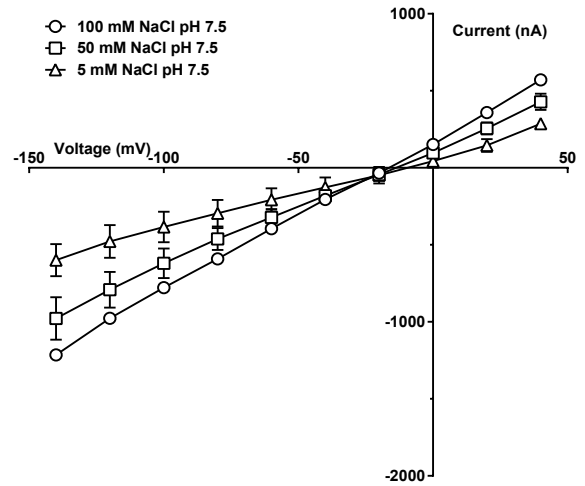**F**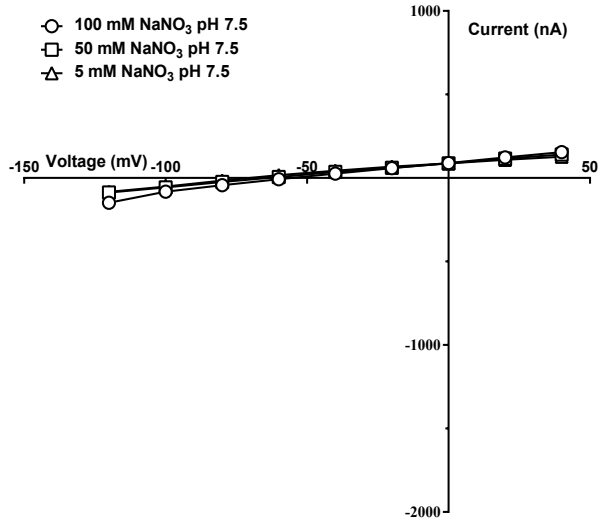**G**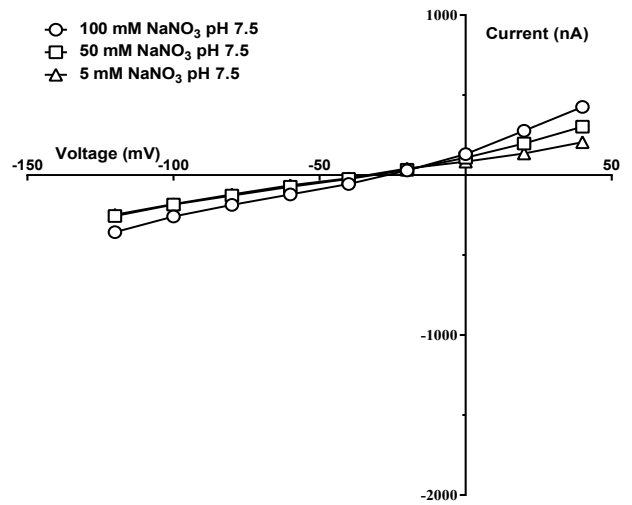

Supplemental Figure 2 Raw and control data for expression of NPF2.4 in *Xenopus laevis* oocytes.

(A) Currents over time for water injected control oocytes, 2 d after injection, clamped at  $-60$  mV, in the presence of 45 mM Na-glutamate (45 Na) and 45 mM Na-glutamate plus 50 mM NMDG-Cl (45 Na + 50 Cl). (B) Total currents (i.e. without leak subtraction) in oocytes expressing *NPF2.4*-cRNA, held at  $-140$  mV in 50 mM NaCl, when exposed to pH 7.5 or 5.5 ( $n = 4$ ). (C) Currents for water injected control oocytes, held at  $-140$  mV in 50 mM NaCl, and exposed to pH 7.5 or 5.5 ( $n = 4$ ). (D) Non-control subtracted currents elicited by *NPF2.4*-cRNA when oocytes were exposed to different concentrations of NaCl ( $n = 3$ ). (E) Currents for water injected oocytes exposed to different concentrations of NaCl ( $n = 3$ ). (F) Total currents (i.e. without leak subtraction) in oocytes expressing *NPF2.4*-cRNA when oocytes were exposed to different concentrations of  $\text{NaNO}_3$  ( $n = 3$ ). (G) Currents for water injected oocytes exposed to different concentrations of  $\text{NaNO}_3$  ( $n = 3$ ). (H) Total currents (i.e. without leak subtraction) in oocytes expressing *NPF2.4*-cRNA when oocytes were exposed to 45 mM Na-glutamate and varying concentrations of NMDG-Cl ( $n = 3-6$ ). (I) Currents for water injected oocytes exposed to 45 mM Na-glutamate and varying concentrations of NMDG-Cl ( $n = 3-4$ ). (J) Total currents (i.e. without leak subtraction) in oocytes expressing *NPF2.4*-cRNA when oocytes were exposed to 45 mM NMDG-Cl and varying concentrations of Na-glutamate ( $n = 5$ ). (K) Currents for water injected oocytes exposed to 45 mM NMDG-Cl and varying concentrations of Na-glutamate ( $n = 5$ ). (L) Conductance for water injected oocytes exposed to solutions containing various different ions; conductance was calculated for  $-80$  mV to  $-100$  mV, dots are means, maximum and minimum values  $\pm$  SEM are represented by a vertical bar ( $n = 3$ ) or box ( $n = 4-6$ ); horizontal bars indicate the median; columns with different letters indicate statistically significant differences ( $P \leq 0.05$ ). (M)  $^{22}\text{Na}^+$  uptake measured in oocytes injected with either *NPF2.4*-cRNA or water, in a background of 100 mM  $\text{Na}^+$  for 60 min; results are scintillation counts per minute, presented as mean  $\pm$  SEM ( $n = 22$  to 30).

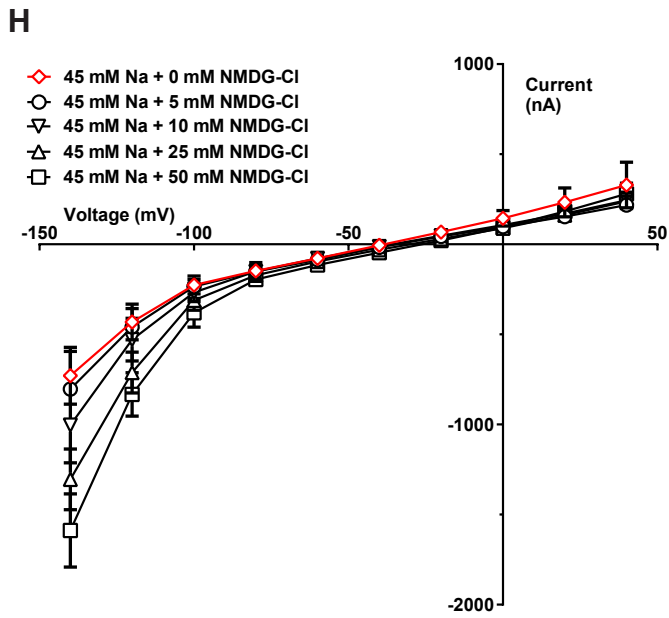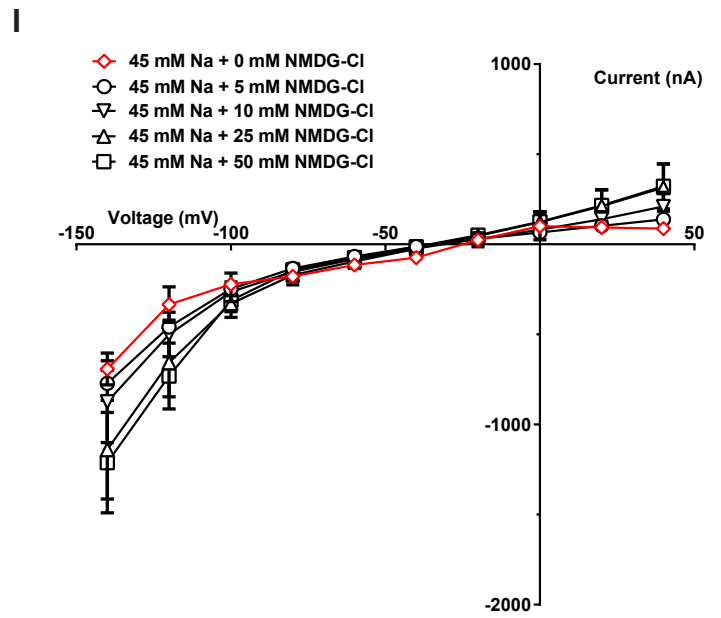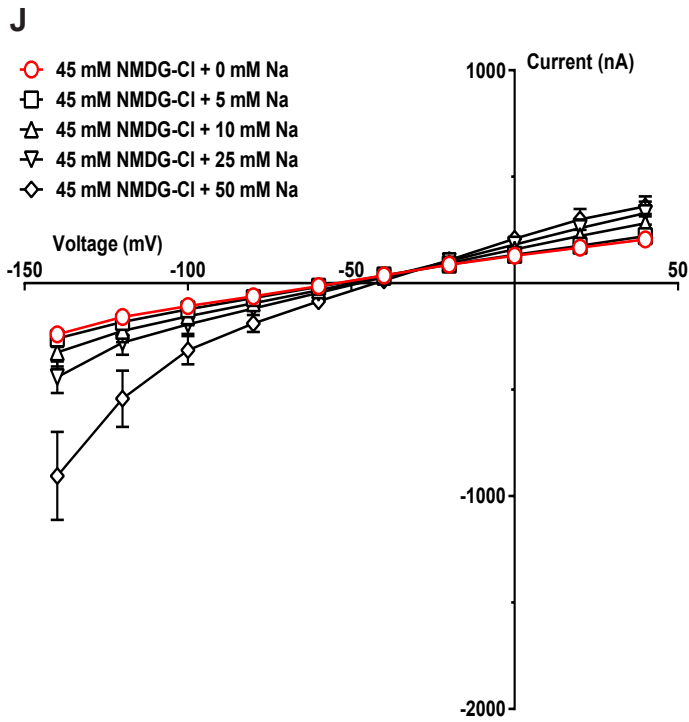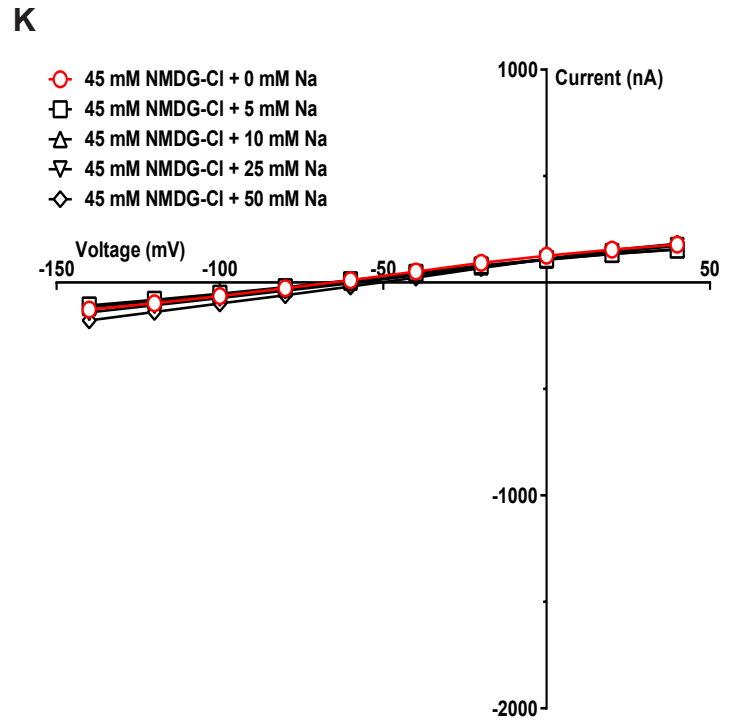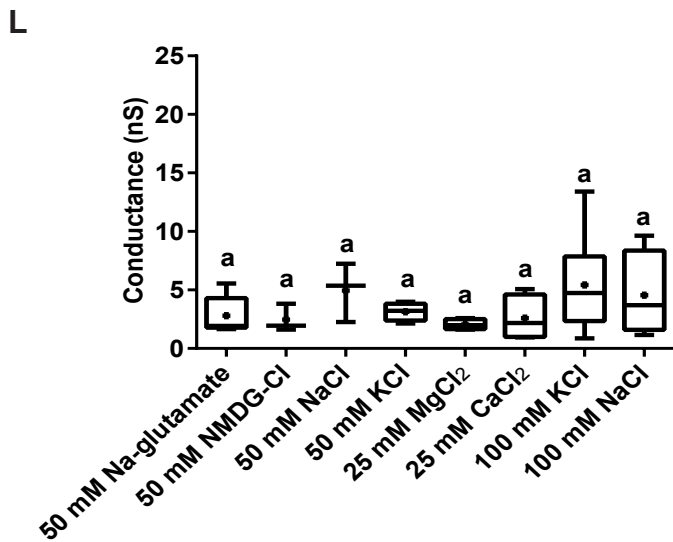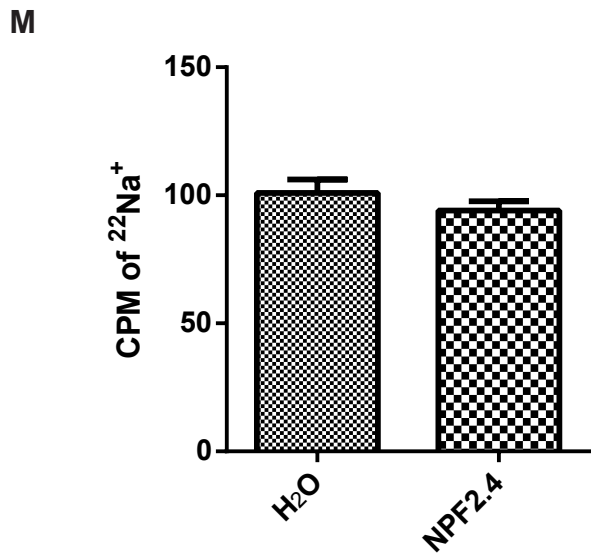

A

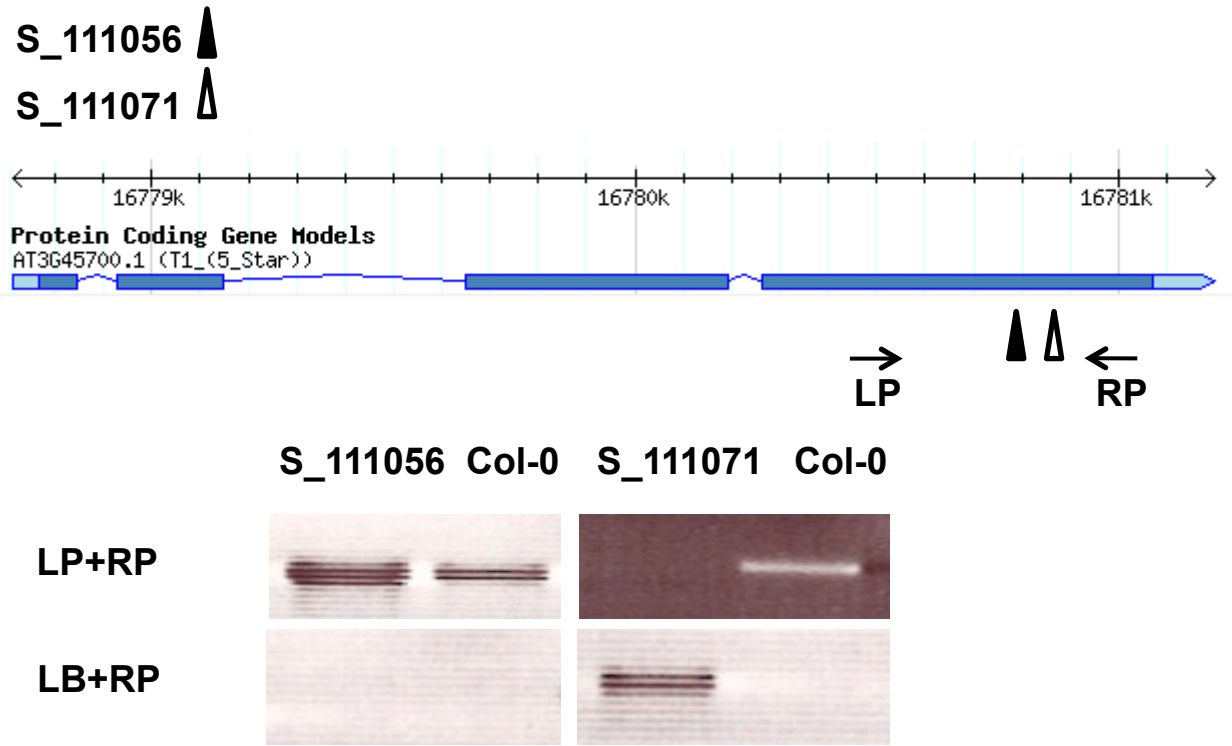

B

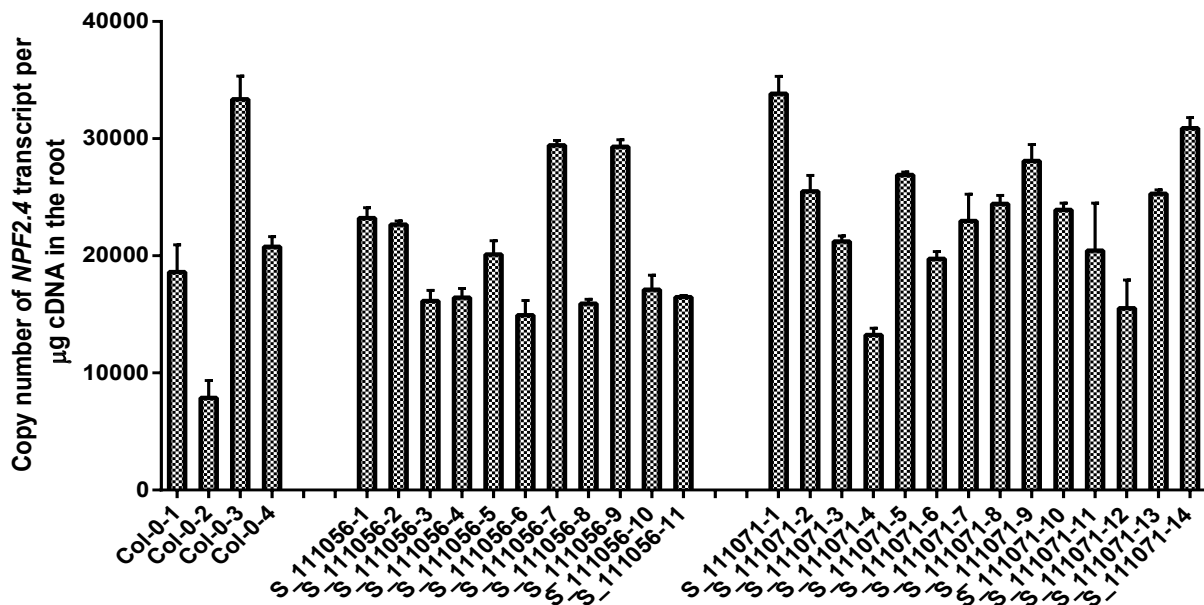

Supplemental Figure 3 *NPF2.4* transcript levels of lines SALK\_111056 and SALK\_111071 annotated as T-DNA knockouts for *NPF2.4* showed the failed disruption of *NPF2.4* expression in both lines.

(A) T-DNA insertions of both obtained SALK lines and results of genotyping PCRs showed that S\_111056 line lost its T-DNA insertion within the ORF of *NPF2.4*. (B) Quantitative RT-PCR was performed on 11 and 14 progenies of T<sub>3</sub> SALK\_111056 and SALK\_111071, respectively and 4 Col-0 WT Arabidopsis plants. Plants were grown hydroponically for 4 weeks. Results are presented as mean  $\pm$  SEM.

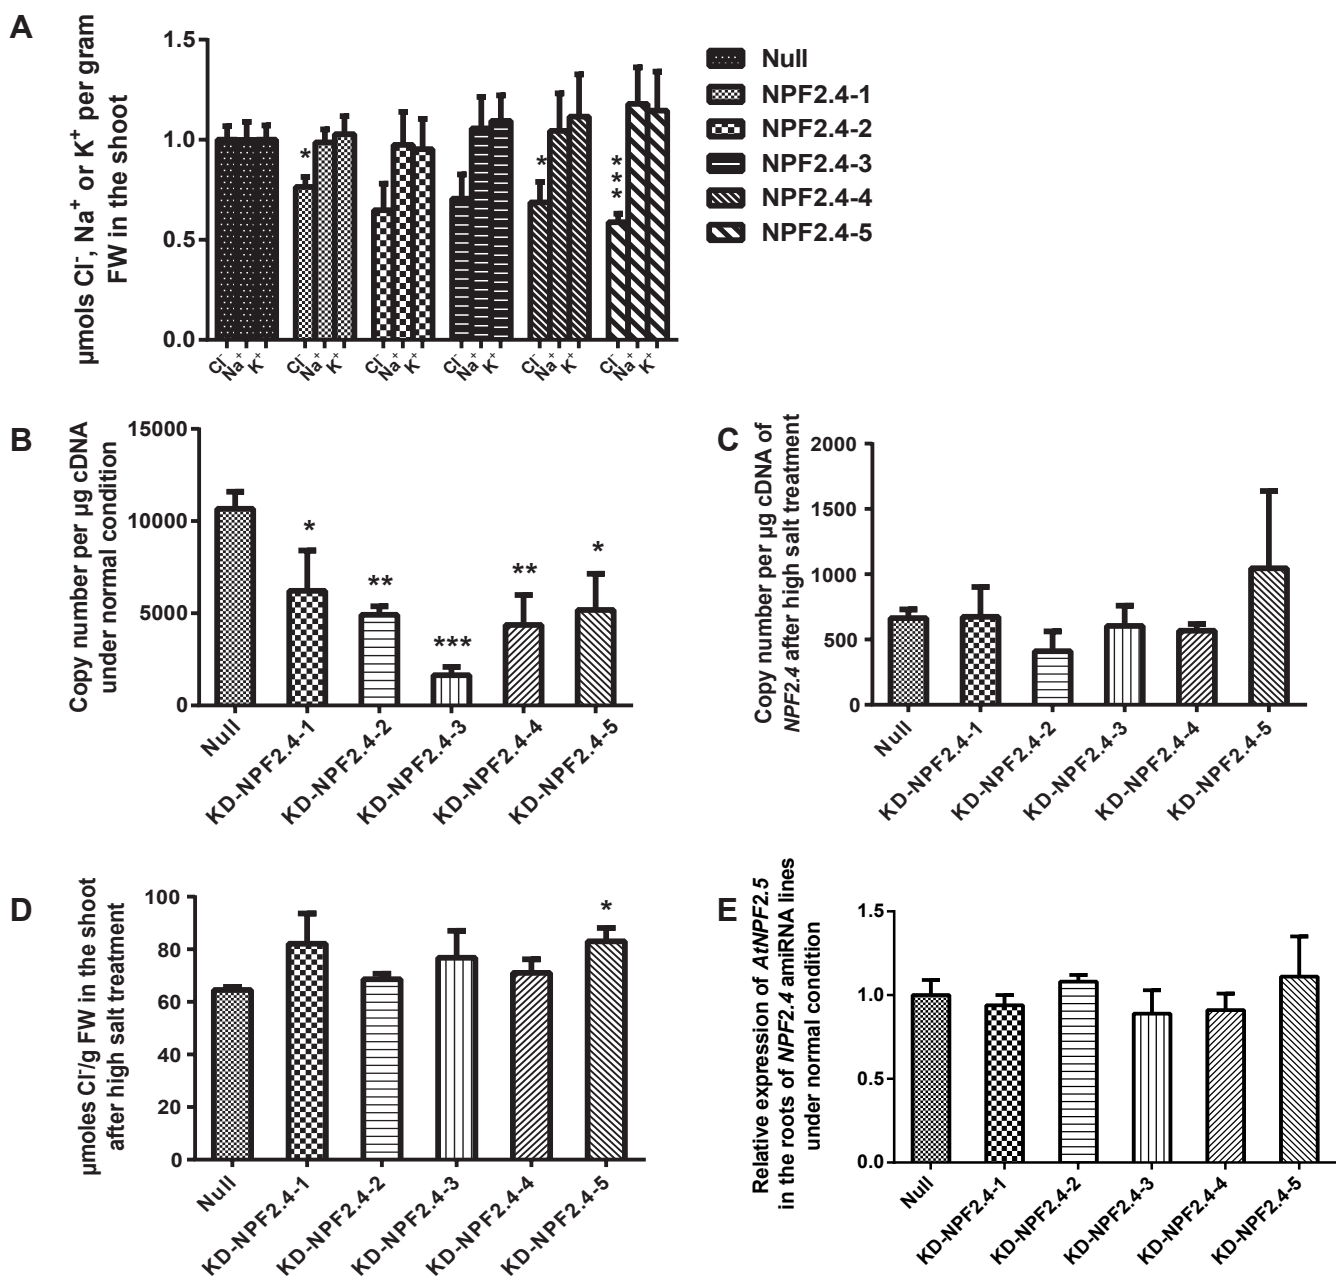

Supplemental Figure 4 Under low salt condition, shoot concentration of both  $\text{Na}^+$  and  $\text{K}^+$  were similar between *NPF2.4* knockdowns and null segregants. Expression of *NPF2.5* was not affected in the roots of *NPF2.4* knockdowns. Under high salt condition, shoot  $\text{Cl}^-$  concentration of knockdowns remained similar to that of null segregants when *NPF2.4* expression in the knockdowns was down-regulated to similar low levels as null segregants.

Four-week old hydroponically grown plants were treated with salt for 5 d. (A) concentrations of  $\text{Cl}^-$ ,  $\text{Na}^+$  and  $\text{K}^+$  in the shoot of *NPF2.4* knockdowns and null segregants after low salt treatment, data was normalized relative to nulls. (B) Expression levels of *NPF2.4* in knockdowns and null segregants after low salt treatment. (C) *NPF2.4* expression in the roots of *NPF2.4* knockdown lines after high salt treatment. (D)  $\text{Cl}^-$  concentrations in the shoot of *NPF2.4* knockdowns and null segregants after high salt treatment. (E) Expression levels of *NPF2.5* in the roots of *NPF2.4* knockdowns after low salt treatment. Results are presented as mean  $\pm$  SEM,  $n = 3$  or 4. Significance is indicated by the asterisks (Single factor ANOVA and Tukey test, \*  $P \leq 0.05$ ).

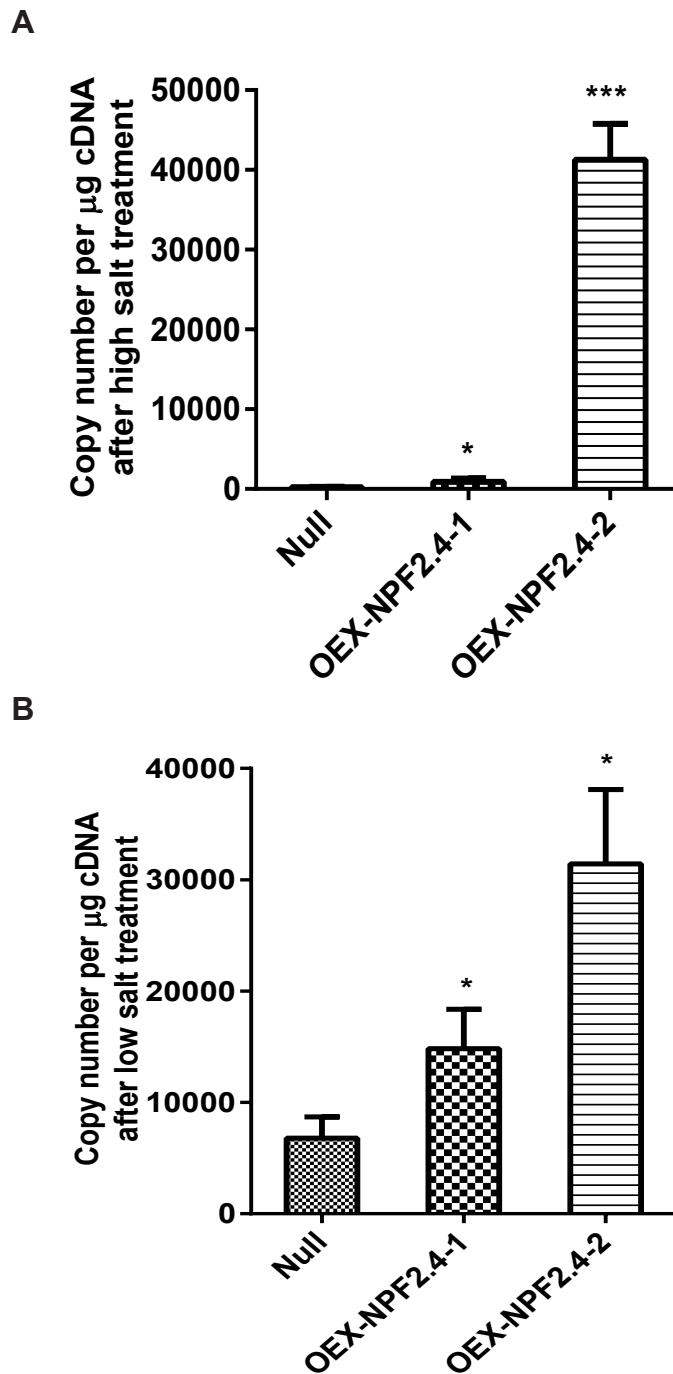

Supplemental Figure 5 Expression validation of *NPF2.4* in the root of *NPF2.4* over-expression lines under both low salt and high salt conditions.

(A) Quantitative RT-PCR on the cDNA samples prepared from roots of *NPF2.4* over expression lines after high salt treatment (75 mM NaCl). (B) Quantitative RT-PCR on the cDNA samples prepared from roots of *NPF2.4* over expression lines after low salt treatment (2 mM NaCl). Results are presented as mean  $\pm$  SEM, n = 4. Significance is indicated by the asterisks (Single factor ANOVA and Tukey test, \*  $P \leq 0.05$ ; \*\*\* $P \leq 0.001$ ).

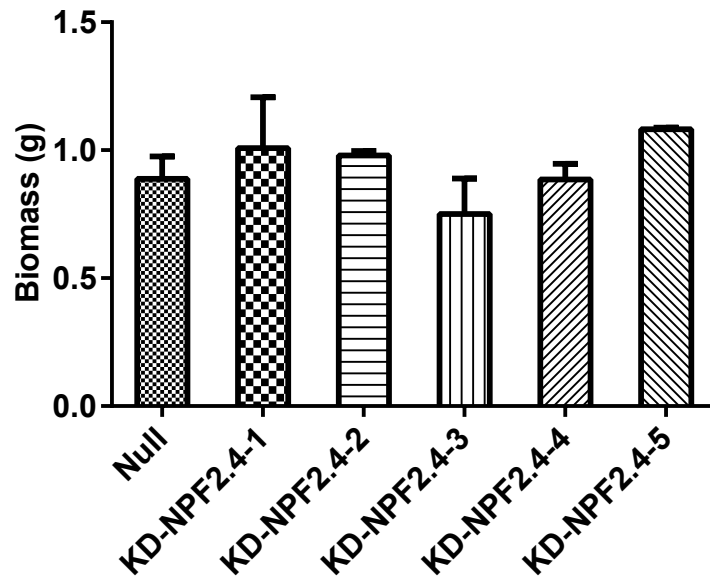

Supplemental Figure 6 Biomass of *NPF2.4* knockdowns was unaffected by low salt condition compared to null segregants.

Four-week old hydroponically grown plants were treated with salt for 5 days. Result is presented as mean  $\pm$  SEM, n = 3 or 4.



**Supplemental Table 1** The ABA signaling pathway associated *cis*-acting elements in the putative promoter region of *NPF2.4*. The 1.5 kb putative promoter region of *NPF2.4* was compared with the entries in a database of known plant *cis*-acting regulatory DNA elements (PLACE) at <http://www.dna.affrc.go.jp/PLACE/>. Date accessed: 7/4/2015.

| Cis-element         | Sequence | Copies | Description                                        | Reference                |
|---------------------|----------|--------|----------------------------------------------------|--------------------------|
| ABRELATERD1         | ACGTG    | 3      | Early dehydration response in Arabidopsis          | (Nakashima et al., 2006) |
| ABREOSRAB21         | ACGTSSSC | 1      | ABA-responsive element in wheat and rice           | (Marcotte et al., 1989)  |
| ABRERATCAL          | MACGYGB  | 3      | Ca <sup>2+</sup> responsive element in Arabidopsis | (Kaplan et al., 2006)    |
| ACGTABREMOTIFA2OSEM | ACGTGKC  | 1      | ABA responsive element in Arabidopsis and rice     | (Narusaka et al., 2003)  |
| ACGTATERD1          | ACGT     | 8      | Dehydration responsive element in Arabidopsis      | (Simpson et al., 2003)   |
| MYB1AT              | WAACA    | 8      | MYB site of ABA responsive elements in Arabidopsis | (Abe et al., 2003)       |
| MYB2AT              | TAACTG   | 2      | Dehydration responsive element in Arabidopsis      | (Urao et al., 1993)      |
| MYB2CONSENSUSAT     | YAACKG   | 3      | ABA responsive element in Arabidopsis              | (Abe et al., 1997)       |
| MYBCORE             | CNGTTR   | 7      | Dehydration responsive element in Arabidopsis      | (Urao et al., 1993)      |
| MYCCONSensusAT      | CANNTG   | 10     | ABA responsive element in Arabidopsis              | (Abe et al., 2003)       |

S: G/C, M: A/C, Y: T/C, N: A/T/C/G, K: A/C/G, W: A/T.

**Supplemental Table 2** Primers used for the generation of *NPF2.4*-amiRNA constructs.

| Target Sequence       | Primer name | Primer Sequence                               |
|-----------------------|-------------|-----------------------------------------------|
| TATAAGTTATCGACATGCCTG | I miR-s     | gaTATAAGTTATCGACATGCCTGtctct<br>cttttgattcc   |
|                       | II miR-a    | gaCAGGCATGTCGATAACTTATAtcaaa<br>gagaatcaatga  |
|                       | III miR-s   | gaCAAGCATGTCGATTACTTATTtcaca<br>ggtcgtgatatg  |
|                       | IV miR-a    | gaAATAAGTAATCGACATGCTTGtctac<br>atatatattcct  |
| TTAAGTATGATAAAGACGCAC | I miR-s     | gaTTAAGTATGATAAAGACGCACtctct<br>cttttgattcc   |
|                       | II miR-a    | gaGTGCGTCTTTATCATACTTAAAtcaaa<br>gagaatcaatga |
|                       | III miR-s   | gaGTACGTCTTTATCTTACTTATtcaca<br>ggtcgtgatatg  |
|                       | IV miR-a    | gaATAAGTAAGATAAAGACGTACTctac<br>atatatattcct  |
